# Supplementary figures and images for: Blocking IL-17A enhances tumor response to anti-PD-1 immunotherapy in microsatellite stable colorectal cancer
Source: HighWire-hosted journal article supplement (doi:10.1136/jitc-2020-001895), 2021-01-01

## Figure S2

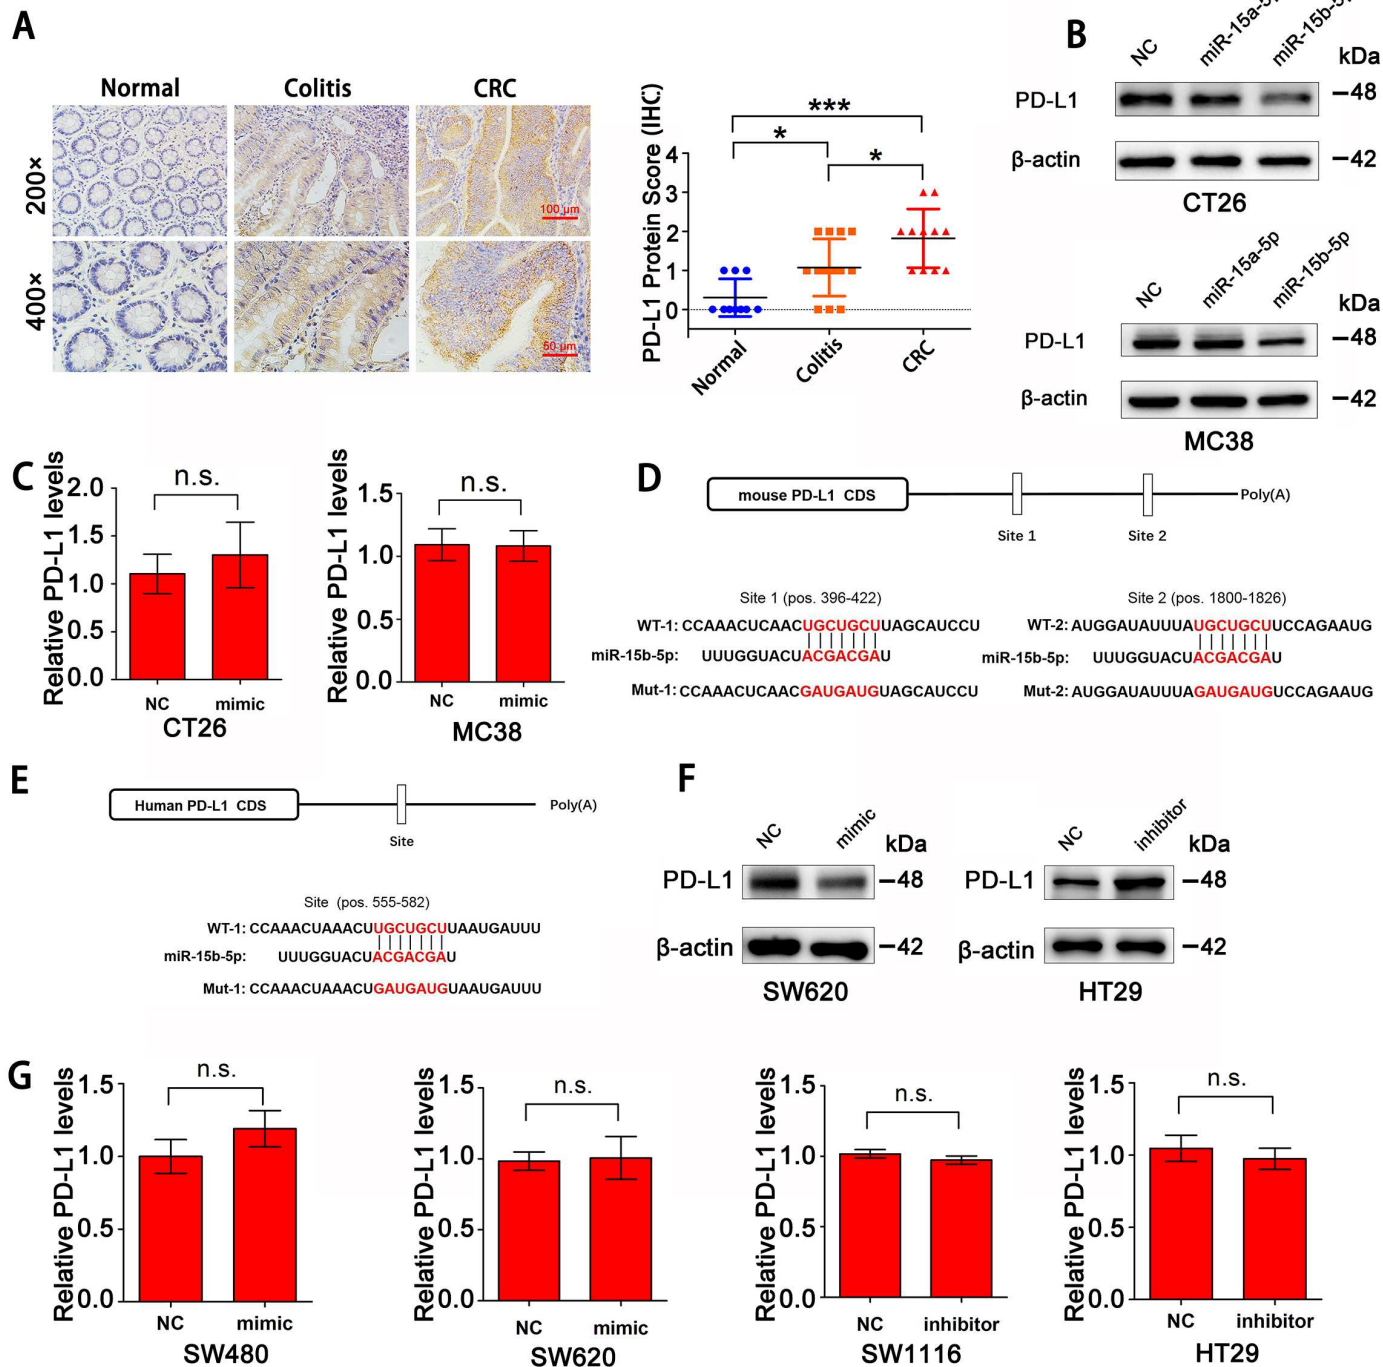

Supplement: jitc-2020-001895supp004_data_supplement.pdf [file jitc-2020-001895supp004_data_supplement.pdf]

Figure S3

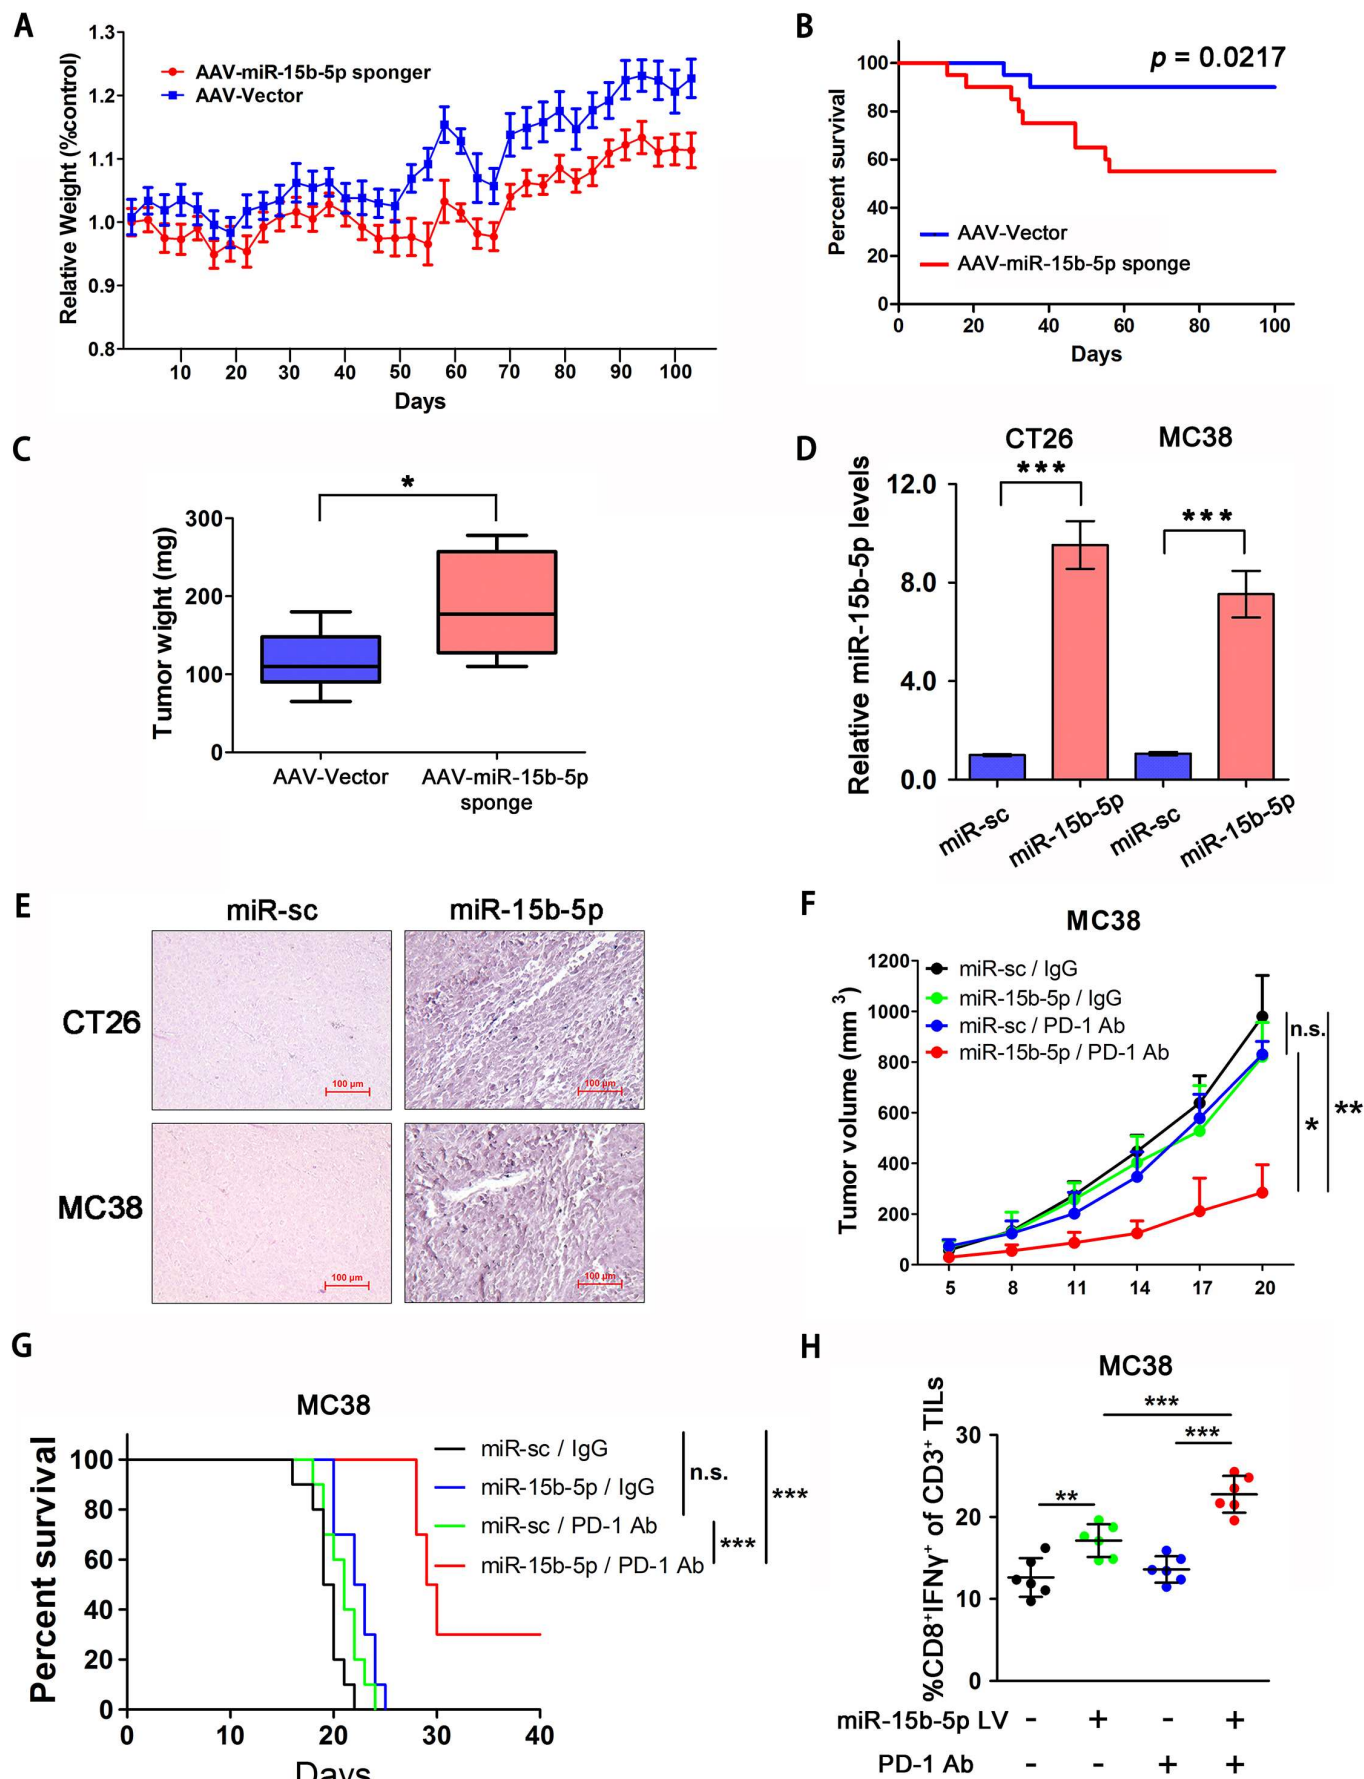

Supplement: jitc-2020-001895supp005_data_supplement.pdf [file jitc-2020-001895supp005_data_supplement.pdf]

### Figure S4

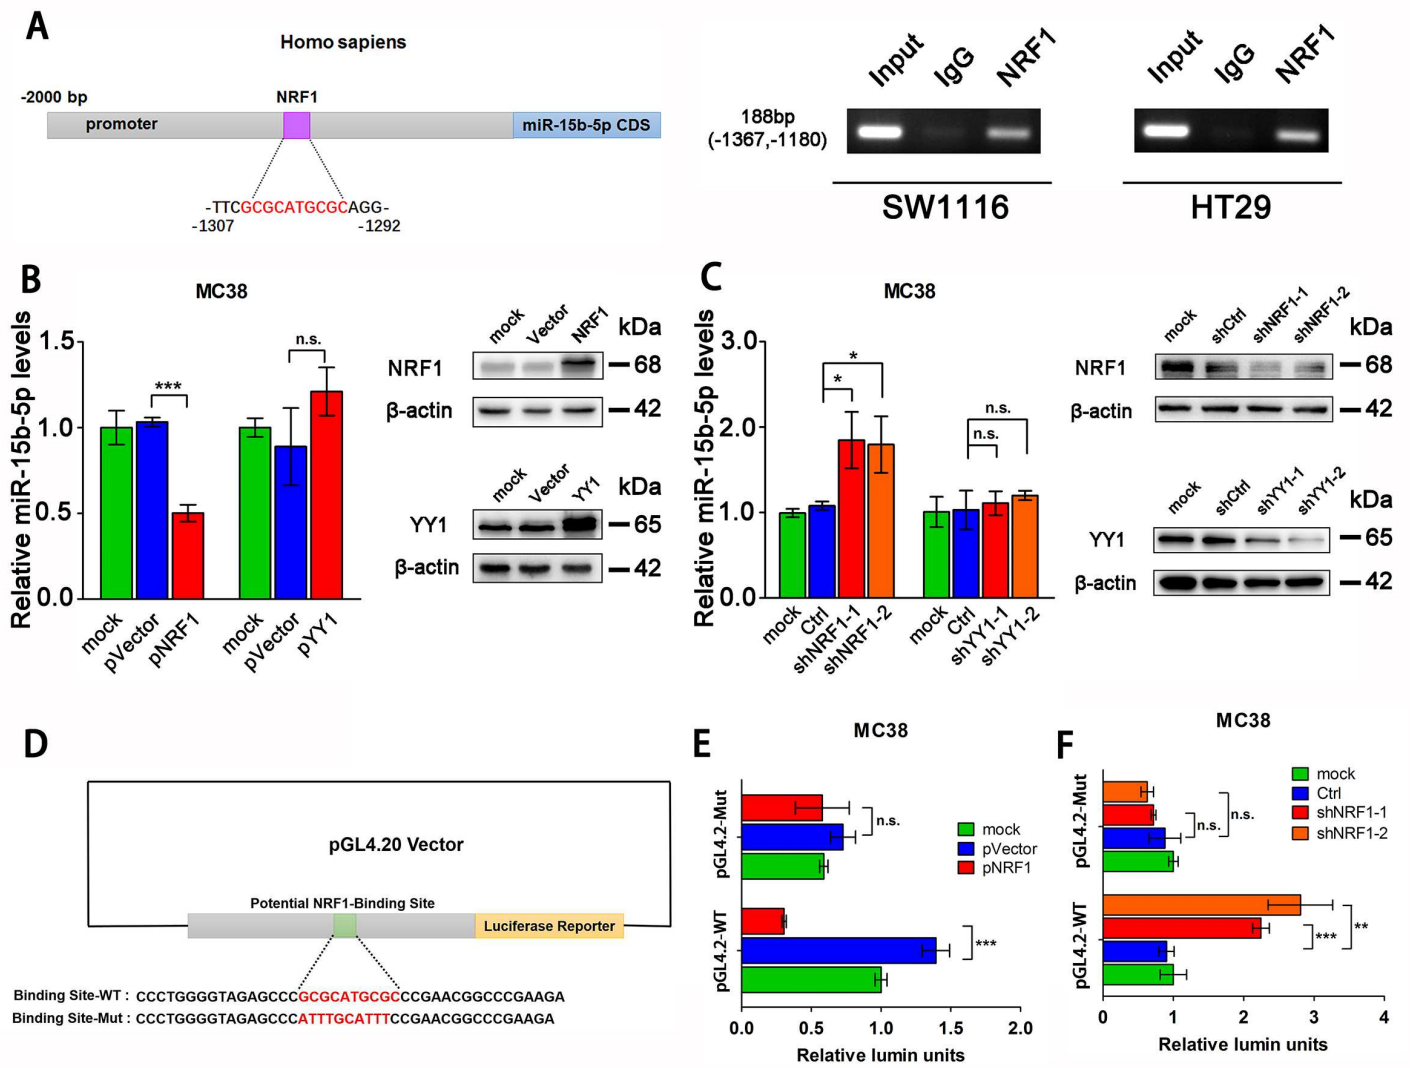

Supplement: jitc-2020-001895supp006_data_supplement.pdf [file jitc-2020-001895supp006_data_supplement.pdf]

## Figure S5

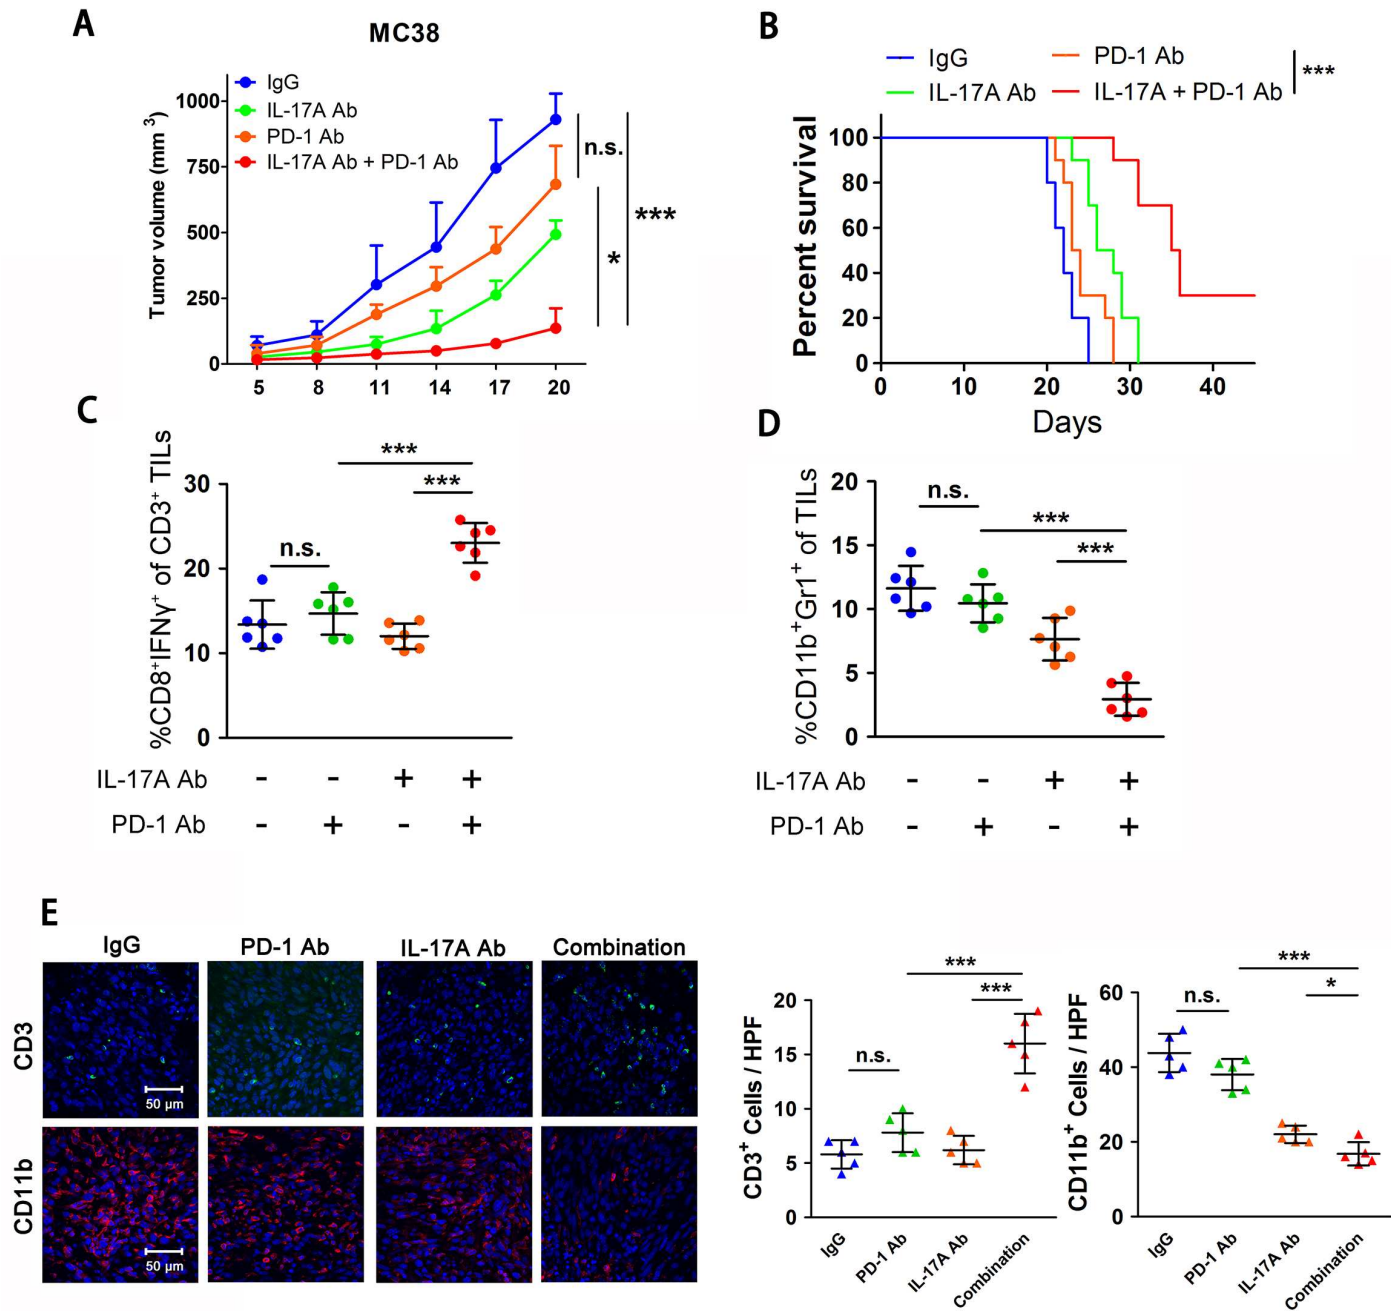

Supplement: jitc-2020-001895supp007_data_supplement.pdf [file jitc-2020-001895supp007_data_supplement.pdf]
